# Supplementary material
Source: Elsevier journal article supplement (https://www.sciencedirect.com/science/article/pii/S1885585724000690)
Supplement: mmc1 [file mmc1.pdf]

**SUPPLEMENTARY DATA**

**Table 1 of the supplementary data**

Cross-sectional association between lifestyle (as well as the analyzed covariates) and unhealthy cardiovascular profile among economically active young individuals (78 421 participants). Data are shown as OR along with 95%CI, with individuals not meeting the lifestyle factor as a reference. Analyses for each lifestyle factor were adjusted by age, sex, socioeconomic status, calendar year, and the remaining lifestyle factors (eg, the analysis of physical activity was adjusted for smoking, sleep, alcohol intake and body mass index)

|                      | <b>Adjusted OR (95%CI)</b> | <b>P value</b> |
|----------------------|----------------------------|----------------|
| Physical activity    | 0.82 (0.78–0.85)           | < .001         |
| Non-smoking          | 0.99 (0.95–1.04)           | .634           |
| Good sleep           | 0.98 (0.98–1.07)           | .364           |
| No alcohol           | 0.98 (0.93–1.02)           | .257           |
| Normal weight        | 0.50 (0.48–0.52)           | < .001         |
| Age                  | 1.09 (1.08–1.10)           | < .001         |
| Sex                  | 0.60 (0.57–0.63)           | < .001         |
| Socioeconomic status | 0.67 (0.57–0.63)           | < .001         |
| Calendar year        | 0.97 (0.95–0.99)           | .003           |

95%CI, 95% confidence interval; OR, odds ratio.

**Table 2 of the supplementary data**

Cross-sectional association between lifestyle factors (as well as the analyzed covariates) and cardiovascular risk factors among economically active young individuals (78 421 participants). Data are shown as OR along with 95%CI, with individuals not meeting the lifestyle factor as a reference. Analyses for each lifestyle factor were adjusted by age, sex, calendar year and socioeconomic status, as well as for the remaining lifestyle factors and cardiometabolic conditions

|                        | Adjusted OR (95%CI) | P value |
|------------------------|---------------------|---------|
| <i>Prediabetes</i>     |                     |         |
| Physical activity      | 0.83 (0.77–0.90)    | < .001  |
| Non-smoking            | 0.91 (0.85–0.97)    | .028    |
| Good sleep             | 0.94 (0.86–1.03)    | .166    |
| No alcohol             | 0.92 (0.85–0.99)    | .032    |
| Normal weight          | 0.61 (0.57–0.66)    | < .001  |
| Age                    | 1.05 (1.03–1.07)    | < .001  |
| Sex                    | 0.49 (0.44–0.53)    | < .001  |
| Socioeconomic status   | 0.42 (0.31–0.56)    | < .001  |
| Calendar year          | 0.97 (0.94–1.01)    | .066    |
| <i>Diabetes</i>        |                     |         |
| Physical activity      | 0.74 (0.58–0.97)    | .021    |
| Non-smoking            | 0.91 (0.71–1.14)    | .375    |
| Good sleep             | 0.87 (0.67–1.12)    | .272    |
| No alcohol             | 0.93 (0.74–1.18)    | .568    |
| Normal weight          | 0.82 (0.65–0.95)    | .003    |
| Age                    | 1.04 (0.99–1.09)    | .095    |
| Sex                    | 0.80 (0.61–1.03)    | .087    |
| Socioeconomic status   | 0.63 (0.26–1.54)    | .316    |
| Calendar year          | 1.02 (0.92–1.12)    | .726    |
| <i>Prehypertension</i> |                     |         |
| Physical activity      | 0.94 (0.92–1.10)    | .185    |
| Non-smoking            | 0.99 (0.95–1.20)    | .791    |
| Good sleep             | 0.98 (0.90–1.15)    | .520    |
| No alcohol             | 0.96 (0.95–1.12)    | .356    |
| Normal weight          | 0.63 (0.60–0.85)    | < .001  |
| Age                    | 1.06 (1.05–1.16)    | < .001  |
| Sex                    | 0.50 (0.48–0.52)    | < .001  |
| Socioeconomic status   | 0.56 (0.33–0.58)    | < .001  |
| Calendar year          | 0.85 (0.84–1.02)    | .087    |
| <i>Hypertension</i>    |                     |         |
| Physical activity      | 0.88 (0.81–0.96)    | .005    |
| Non-smoking            | 0.89 (0.82–0.98)    | .013    |
| Good sleep             | 0.99 (0.90–1.10)    | .982    |

|                             |                  |        |
|-----------------------------|------------------|--------|
| No alcohol                  | 0.98 (0.89–1.04) | .640   |
| Normal weight               | 0.33 (0.29–0.34) | < .001 |
| Age                         | 1.01 (0.99–1.03) | .099   |
| Sex                         | 0.27 (0.24–0.31) | < .001 |
| Socioeconomic status        | 1.97 (1.40–2.77) | < .001 |
| Calendar year               | 0.96 (0.93–0.99) | .047   |
| <i>Hypercholesterolemia</i> |                  |        |
| Physical activity           | 0.86 (0.81–0.91) | < .001 |
| Non-smoking                 | 0.99 (0.97–1.05) | .680   |
| Good sleep                  | 0.94 (0.89–1.01) | .091   |
| No alcohol                  | 0.97 (0.92–1.03) | .317   |
| Normal weight               | 0.53 (0.51–0.55) | < .001 |
| Age                         | 1.12 (1.11–1.13) | < .001 |
| Sex                         | 1.05 (0.99–1.11) | .991   |
| Socioeconomic status        | 0.94 (0.76–1.16) | .567   |
| Calendar year               | 0.98 (0.95–1.00) | .079   |

95%CI, 95% confidence interval; OR, odds ratio.

**Table 3 of the supplementary data**

Descriptive characteristics of study participants with follow-up data compared with those who only had baseline data

|                                            | No follow-up<br>(n = 33 645) | Follow-up<br>(n = 44 776) | <b>P value</b> |
|--------------------------------------------|------------------------------|---------------------------|----------------|
| <b>Age (years)</b>                         | 27 ± 2                       | 28 ± 3                    | < .001         |
| <b>Sex (female)</b>                        | 38%                          | 34%                       | < .001         |
| <b>Total cholesterol (mg/dL)</b>           | 174 ± 32                     | 176 ± 32                  | < .001         |
| <b>HDL-cholesterol (mg/dL)<sup>a</sup></b> | 57 ± 14                      | 56 ± 14                   | .085           |
| <b>LDL-cholesterol (mg/dL)<sup>b</sup></b> | 121 ± 33                     | 121 ± 32                  | .413           |
| <b>Hypercholesterolemia (%)</b>            | 10.2%                        | 10.6%                     | .062           |
| <b>SBP/DBP (mmHg)</b>                      | 111±12/66±8                  | 112±12/67±9               | < .001         |
| <b>Prehypertension (%)</b>                 | 3%                           | 4%                        | < .001         |
| <b>Hypertension (%)</b>                    | 0%                           | 0%                        | .999           |
| <b>Fasting glycemia (mg/dL)</b>            | 87 ± 11                      | 87 ± 11                   | .091           |
| <b>Prediabetes (%)</b>                     | 1%                           | 1%                        | .171           |
| <b>Diabetes (%)</b>                        | 0.5%                         | 0.4%                      | .570           |
| <b>BMI (kg·m2)</b>                         | 24.4 ± 4.0                   | 24.5 ± 4.0                | < .001         |
| <b>Normal weight (%)</b>                   | 62%                          | 61%                       | < .001         |
| <b>Overweight (%)</b>                      | 29%                          | 30%                       | < .001         |
| <b>Obesity (%)</b>                         | 9%                           | 9%                        | .513           |
| <b>Smoking (%)</b>                         | 36%                          | 37%                       | .005           |
| <b>Alcohol drinking (%)</b>                | 10%                          | 10%                       | .443           |
| <b>“Poor” sleep (%)</b>                    | 24%                          | 23%                       | .003           |
| <b>Physical inactivity (%)</b>             | 36%                          | 35%                       | .086           |

BMI, body mass index; DBP, diastolic blood pressure; HDL, high-density lipoprotein; LDL, low-density lipoprotein; SBP, systolic blood pressure.

Data are expressed as mean  $\pm$  standard deviation.

<sup>a</sup> total n with data = 11 425.

<sup>b</sup> total n with data = 6940.

**Table 4 of the supplementary data**

Prospective association between lifestyle (as well as the analyzed covariates) and unhealthy cardiovascular risk profile among economically active young individuals (n = 44 776). Data are shown as OR along with 95%CI, with individuals not meeting the lifestyle factor as a reference. Analyses for each lifestyle factor were adjusted by age, sex, socioeconomic status, length of the follow-up (as a logarithm), and the remaining lifestyle factors.

|                      | <b>Adjusted OR (95%CI)</b> | <b>P value</b> |
|----------------------|----------------------------|----------------|
| Physical activity    | 0.95 (0.81–0.99)           | < .001         |
| Non-smoking          | 0.99 (0.85–1.16)           | .930           |
| Good sleep           | 0.85 (0.60–1.04)           | .104           |
| No alcohol           | 0.95 (0.81–1.10)           | .539           |
| Normal weight        | 0.61 (0.51–0.70)           | < .001         |
| Age                  | 1.06 (1.03–1.10)           | < .001         |
| Sex                  | 0.69 (0.58–0.83)           | < .001         |
| Socioeconomic status | 0.80 (0.44–1.45)           | < .001         |
| Length of follow-up  | 0.54 (0.49–0.58)           | < .001         |

95%CI, 95% confidence interval; OR, odds ratio.

**Table 5 of the supplementary data**

Prospective association between lifestyle (as well as the analyzed covariates) and cardiovascular risk factors among economically active young individuals (n = 44 776). Data are shown as OR along with 95%CI, with individuals not meeting the lifestyle factor as a reference. Analyses for each lifestyle factor were adjusted by age, sex, length of the follow-up (as a logarithm), socioeconomic status, as well as for the remaining lifestyle factors and cardiometabolic conditions.

|                        | Adjusted OR (95%CI) | P value |
|------------------------|---------------------|---------|
| <i>Prediabetes</i>     |                     |         |
| Physical activity      | 0.85 (0.45–0.98)    | .047    |
| Non-smoking            | 0.92 (0.50–1.05)    | .451    |
| Good sleep             | 0.98 (0.39–1.47)    | .520    |
| No alcohol             | 0.99 (0.47–1.85)    | .925    |
| Normal weight          | 0.80 (0.33–1.52)    | .967    |
| Age                    | 1.05 (0.95–1.28)    | .745    |
| Sex                    | 0.25 (0.20–0.63)    | < .001  |
| Socioeconomic status   | 2.15 (0.19–8.15)    | .754    |
| Length of follow-up    | 0.48 (0.32–0.71)    | < .001  |
| <i>Diabetes</i>        |                     |         |
| Physical activity      | 0.59 (0.30–1.17)    | .130    |
| Non-smoking            | 0.92 (0.49–1.71)    | .790    |
| Good sleep             | 0.75 (0.39–1.47)    | .409    |
| No alcohol             | 0.98 (0.52–1.84)    | .951    |
| Normal weight          | 0.61 (0.33–1.14)    | .116    |
| Age                    | 1.11 (0.97–1.27)    | .121    |
| Sex                    | 0.24 (0.22–0.62)    | .003    |
| Socioeconomic status   | 2.23 (0.19–10.26)   | .523    |
| Length of follow-up    | 0.48 (0.33–0.70)    | < .001  |
| <i>Prehypertension</i> |                     |         |
| Physical activity      | 0.80 (0.65–0.99)    | .045    |
| Non-smoking            | 0.99 (0.84–1.25)    | .685    |
| Good sleep             | 0.99 (0.85–1.23)    | .930    |
| No alcohol             | 0.98 (0.85–1.05)    | .750    |
| Normal weight          | 0.50 (0.34–0.65)    | < .001  |
| Age                    | 1.01 (0.95–1.45)    | .865    |
| Sex                    | 0.27 (0.21–0.40)    | < .001  |
| Socioeconomic status   | 1.20 (1.15–2.23)    | .005    |
| Length of follow-up    | 0.45 (0.35–0.57)    | < .001  |
| <i>Hypertension</i>    |                     |         |
| Physical activity      | 0.86 (0.74–0.99)    | .038    |
| Non-smoking            | 0.99 (0.86–1.14)    | .865    |
| Good sleep             | 0.99 (0.85–1.17)    | .944    |

|                             |                  |        |
|-----------------------------|------------------|--------|
| No alcohol                  | 0.98 (0.85–1.13) | .759   |
| Normal weight               | 0.50 (0.34–0.57) | < .001 |
| Age                         | 1.01 (0.98–1.03) | .785   |
| Sex                         | 0.27 (0.22–0.33) | < .001 |
| Socioeconomic status        | 2.22 (1.28–3.87) | .005   |
| Length of follow-up         | 0.49 (0.46–0.54) | < .001 |
| <i>Hypercholesterolemia</i> |                  |        |
| Physical activity           | 0.99 (0.91–0.99) | < .001 |
| Non-smoking                 | 0.91 (0.80–0.98) | .008   |
| Good sleep                  | 0.97 (0.87–0.98) | .496   |
| No alcohol                  | 0.92 (0.82–1.01) | .054   |
| Normal weight               | 0.68 (0.63–0.74) | < .001 |
| Age                         | 1.07 (1.05–1.09) | < .001 |
| Sex                         | 0.65 (0.59–0.71) | < .001 |
| Socioeconomic status        | 0.60 (0.44–0.83) | .002   |
| Length of follow-up         | 0.50 (0.48–0.53) | < .001 |

95%CI, 95% confidence interval; OR, odds ratio.
